# Supplementary material for: Extended investigation of the conductive characteristics of monoclinic tungstates with a Bi3.24Ln2W0.76O10.14 (Ln = La, Pr or Nd) composition
Source: Royal Society of Chemistry journal article supplement (doi:10.1039/d4dt02462a), 2024-01-01
Supplement: d4dt02462a1.pdf [file d4dt02462a1.pdf]

## SUPPLEMENTARY INFORMATION

Extended investigation of the conductive characteristics of monoclinic tungstates with

a  $\text{Bi}_{3.24}\text{Ln}_2\text{W}_{0.76}\text{O}_{10.14}$  ( $\text{Ln} = \text{La}, \text{Pr}$  or  $\text{Nd}$ ) composition

AUTHOR ADDRESS

Ekaterina I. Orlova<sup>a</sup>, Yelizaveta A. Morkhova<sup>\*b,c</sup>, Nikolay V. Lyskov<sup>d,e</sup>, Anastasia V. Egorova<sup>f,g</sup>, Egor D. Baldin<sup>h</sup>, Artem A. Kabanov<sup>i</sup>, Elena P. Kharitonova<sup>a</sup>, Valentina I. Voronkova<sup>a</sup>

<sup>a</sup>Lomonosov Moscow State University, Faculty of Physics, 119991 Moscow, Russia

<sup>b</sup>Samara State Technical University, 443100 Samara, Russia

<sup>c</sup>Laboratory of Nature-Inspired Technologies and Environmental Safety of the Arctic, Nanomaterial Research Center of the Kola Science Centre, Russian Academy of Sciences, 184209, Apatity, Russia

<sup>d</sup>Federal Research Center of Problems of Chemical Physics and Medical Chemistry of the Russian Academy of Sciences, 142432 Chernogolovka, Russia

<sup>e</sup>HSE University, 101000 Moscow, Russia

<sup>f</sup>Ural Federal University, 620000 Yekaterinburg, Russia

<sup>g</sup>Laboratory of Selectively Permeable Ceramics and Engineering, Institute of Solid State Chemistry of UB RAS, 620041 Yekaterinburg, Russia

<sup>h</sup>N.N. Semenov Federal Research Center For Chemical Physics RAS, Kosygina 4, Moscow, 119991, Russian Federation

<sup>i</sup>P. N. Lebedev Physical Institute of the Russian Academy of Sciences, 443011 Samara, Russia

\* [eliztimofeeva@mail.ru](mailto:eliztimofeeva@mail.ru)

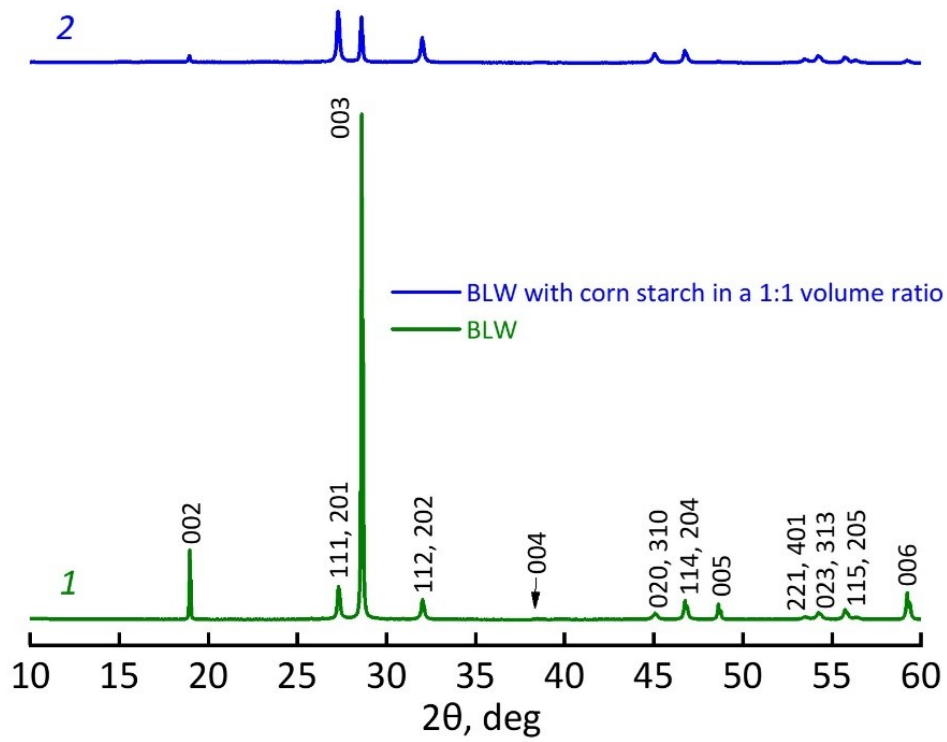

**Fig. S1.** Powder XRD patterns of (1)  $\text{Bi}_{3.24}\text{La}_2\text{W}_{0.76}\text{O}_{10.14}$  (BLW) ceramics and (2) the  $\text{Bi}_{3.24}\text{La}_2\text{W}_{0.76}\text{O}_{10.14}$  (BLW) sample powder mixed with corn starch in a 1:1 volume ratio.

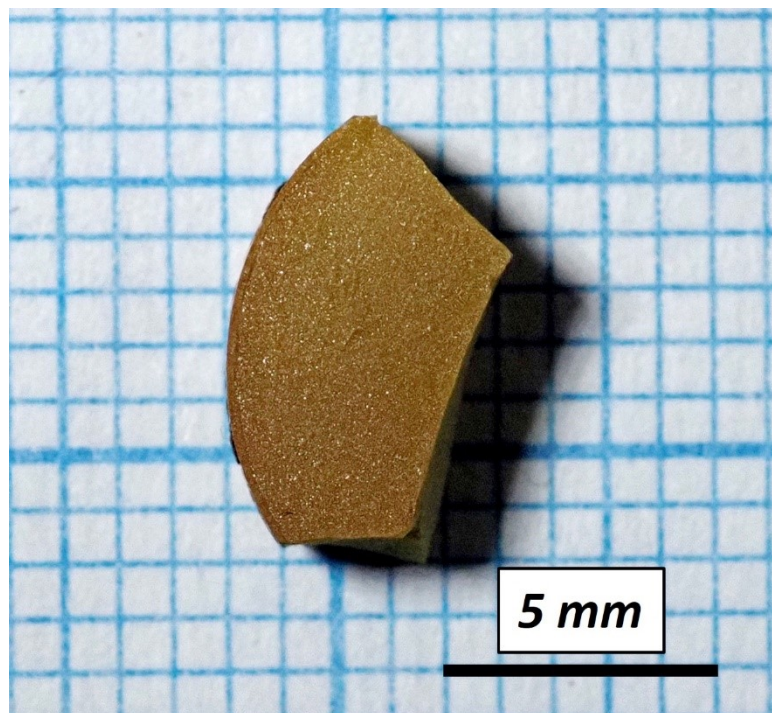

**Fig. S2.** Photograph of  $\text{Bi}_{3.24}\text{Pr}_2\text{W}_{0.76}\text{O}_{10.14}$  (BPW) ceramics in daylight.

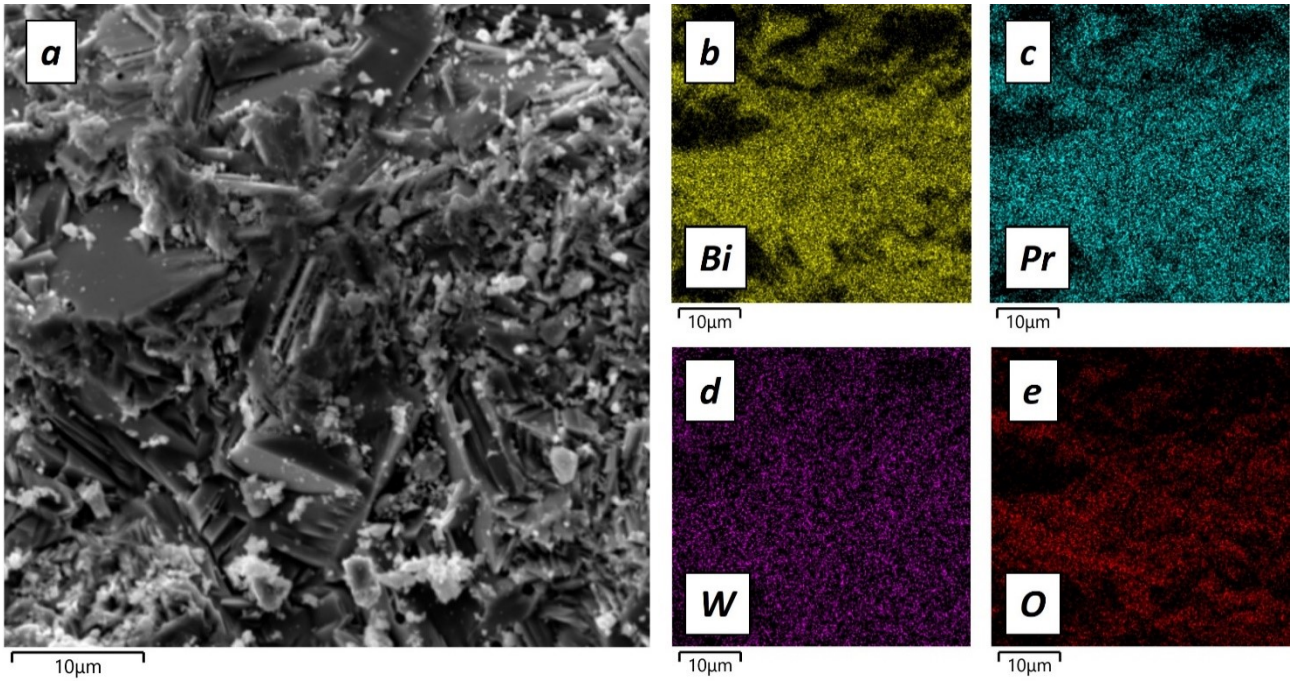

Fig. S3. (a) The BPW ceramics SEM micrograph, test area; (b) Bi element mapping; (c) Pr element mapping; (d) W element mapping; (e) O element mapping.

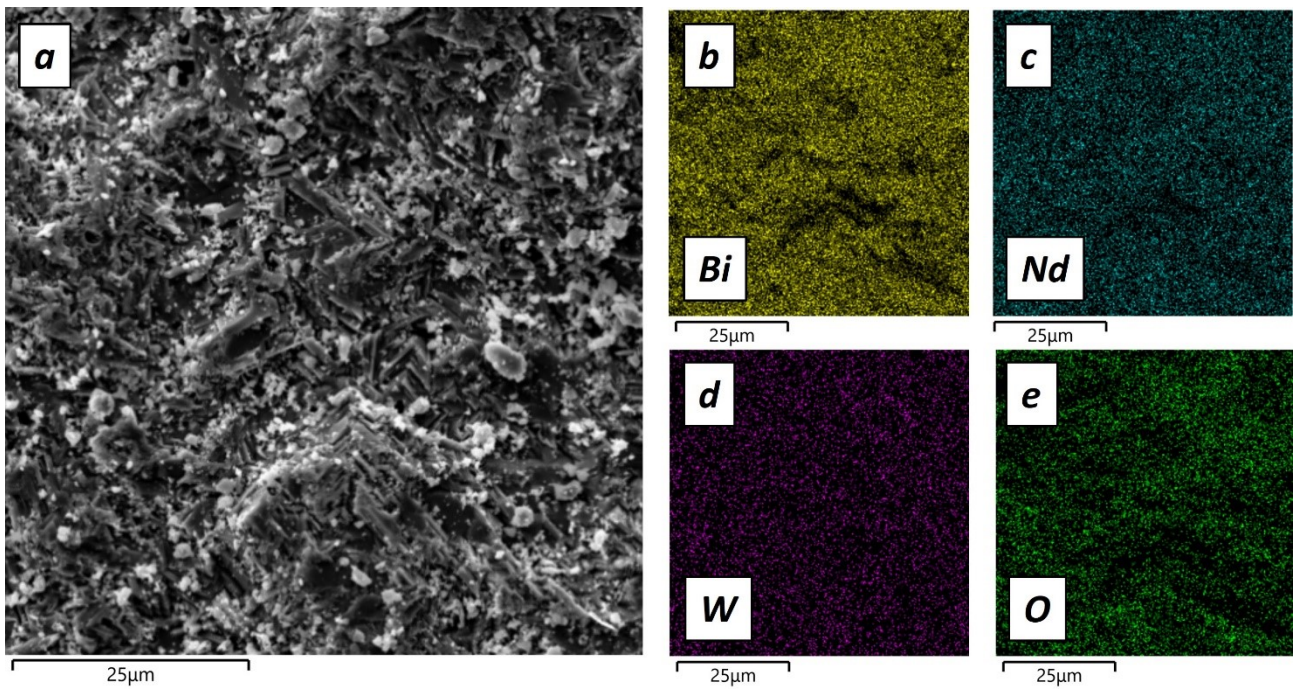

Fig. S4. (a) The BNW ceramics SEM micrograph, test area; (b) Bi element mapping; (c) Nd element mapping; (d) W element mapping; (e) O element mapping.



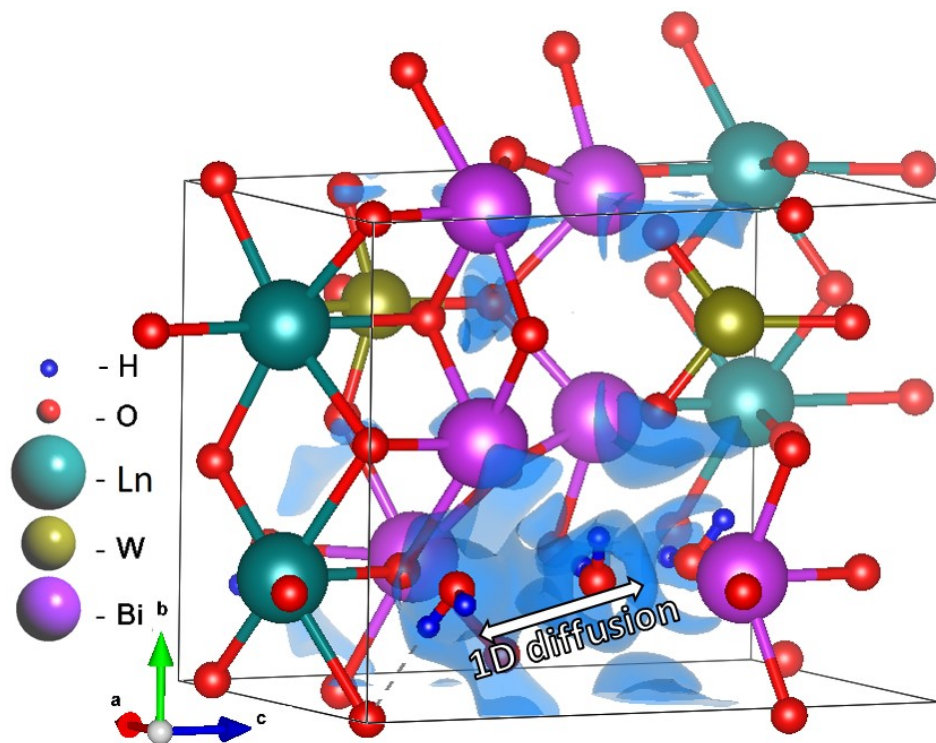

**Fig. S5.** Proton migrations from the BVSE approach in the  $\text{Bi}_{3.24}\text{Ln}_2\text{W}_{0.76}\text{O}_{10.14}$  ( $\text{Ln} = \text{La}, \text{Pr}$  or  $\text{Nd}$ ) with 1.5 maximum possible water molecules (0.75 per formula unit).

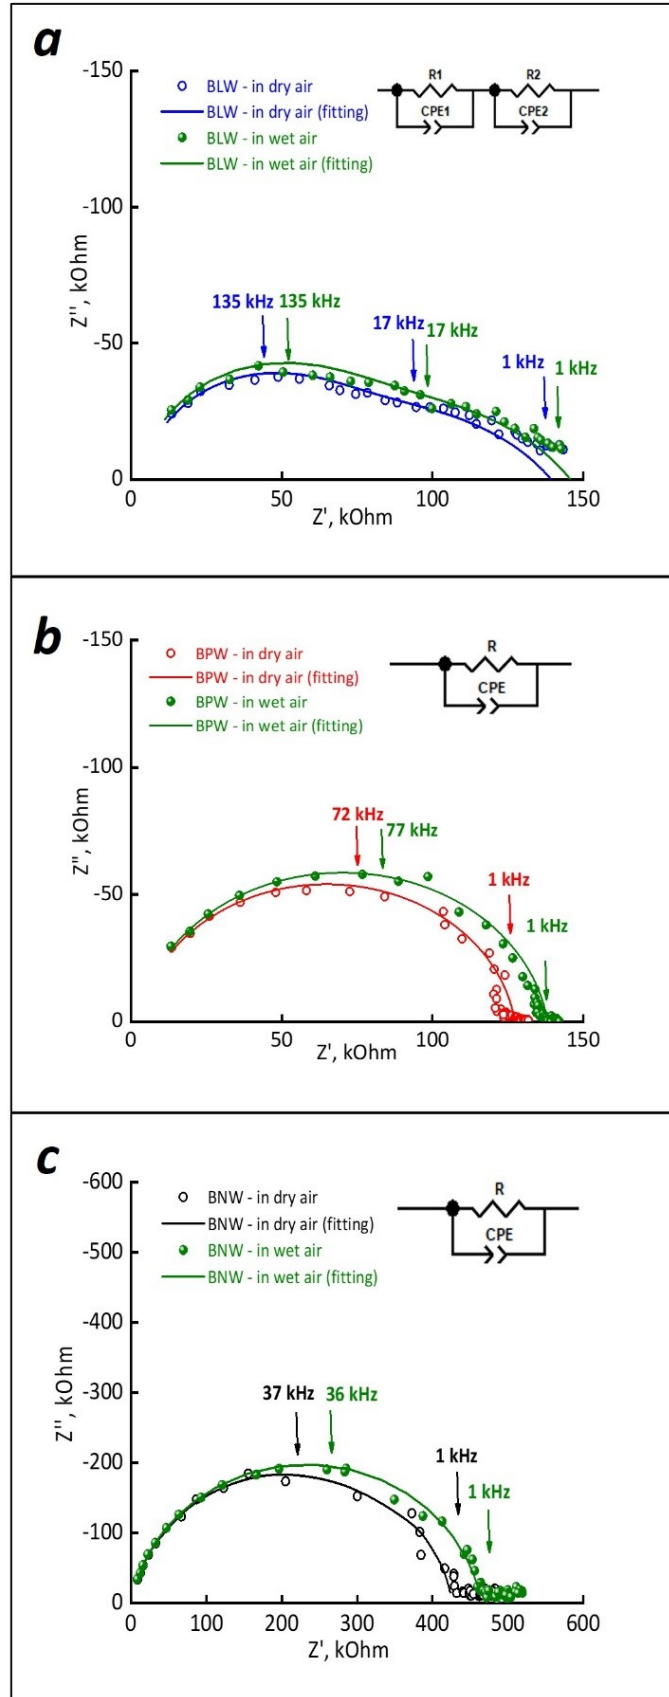

**Figure S6.** Impedance hodographs of the (a)  $\text{Bi}_{3.24}\text{La}_2\text{W}_{0.76}\text{O}_{10.14}$  (BLW), (b)  $\text{Bi}_{3.24}\text{Pr}_2\text{W}_{0.76}\text{O}_{10.14}$  (BPW) and (c)  $\text{Bi}_{3.24}\text{Nd}_2\text{W}_{0.76}\text{O}_{10.14}$  (BNW) ceramics in a dry and humid atmosphere at 450 °C.

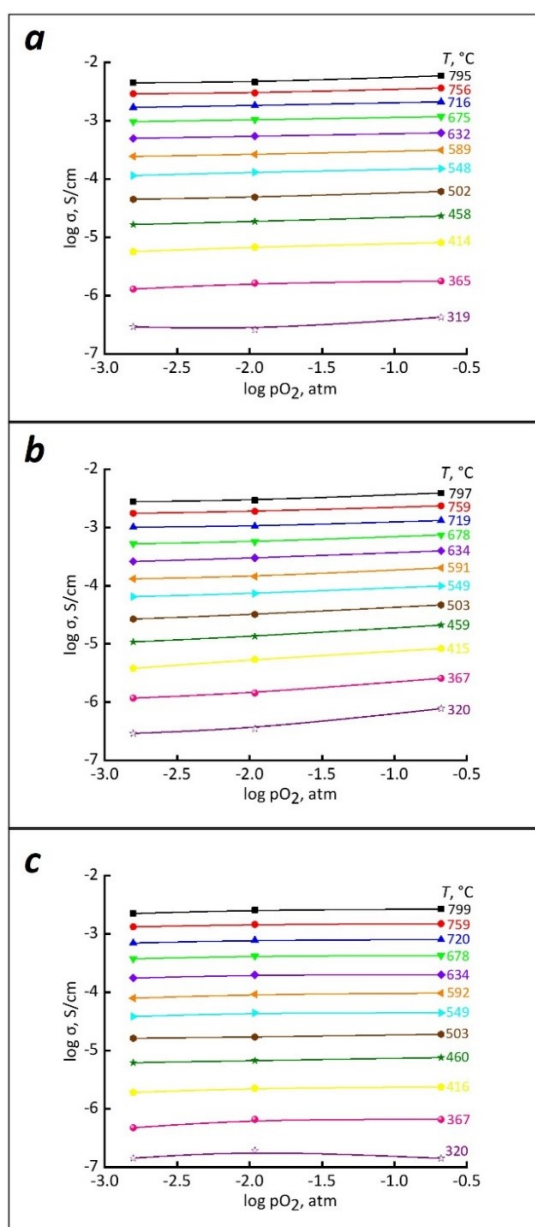

**Fig. S7.** Total conductivity oxygen partial pressure  $p(\text{O}_2)$  dependences of the (a)  $\text{Bi}_{3.24}\text{La}_2\text{W}_{0.76}\text{O}_{10.14}$  (BLW), (b)  $\text{Bi}_{3.24}\text{Pr}_2\text{W}_{0.76}\text{O}_{10.14}$  (BPW) and (c)  $\text{Bi}_{3.24}\text{Nd}_2\text{W}_{0.76}\text{O}_{10.14}$  (BNW) ceramics.

**Table S1.** Equivalent circuit fit parameters for the complex impedance plots of the BLW, BPW, BNW samples in a dry and wet atmosphere at 450 °C.

| Sample        | Bulk                               |                                        |                 | Grain boundary                  |                                    |                 |
|---------------|------------------------------------|----------------------------------------|-----------------|---------------------------------|------------------------------------|-----------------|
|               | $R1$ ,<br>$\text{Ohm} \times 10^6$ | $CPE1$ ,<br>$\text{T} \times 10^{-11}$ | $CPE1$ , P      | $R2$ , $\text{Ohm} \times 10^6$ | $CPE2$ , $\text{T} \times 10^{-8}$ | $CPE2$ , P      |
| BLW (dry air) | $0.05 \pm 0.01$                    | $1.78 \pm 0.05$                        | $1.01 \pm 0.01$ | $0.09 \pm 0.01$                 | $1.30 \pm 0.05$                    | $0.56 \pm 0.01$ |
| BLW (wet air) | $0.05 \pm 0.01$                    | $1.75 \pm 0.05$                        | $1.01 \pm 0.01$ | $0.09 \pm 0.01$                 | $0.94 \pm 0.05$                    | $0.60 \pm 0.01$ |
| BPW (dry air) | $0.13 \pm 0.01$                    | $3.37 \pm 0.05$                        | $0.91 \pm 0.01$ | -                               | -                                  | -               |
| BPW (wet air) | $0.14 \pm 0.01$                    | $3.47 \pm 0.05$                        | $0.91 \pm 0.01$ | -                               | -                                  | -               |
| BNW (dry air) | $0.42 \pm 0.01$                    | $2.96 \pm 0.05$                        | $0.92 \pm 0.01$ | -                               | -                                  | -               |
| BNW (wet air) | $0.47 \pm 0.01$                    | $3.93 \pm 0.05$                        | $0.90 \pm 0.01$ | -                               | -                                  | -               |
